## Antennae are the key for courting wasps

K. Phillips

doi:10.1242/jeb.023333

There was an error published in *J. Exp. Biol.* 211(15), ii.

The published title was 'Antennae are key for courting fruitflies'.

This should have read 'Antennae are key for courting wasps'.

We apologise to our readers for this error.
